# Supplementary material for: Development of a low-cost cellulase production process using Trichoderma reesei for Brazilian biorefineries
Source: PubMed Central journal article supplement (PMC5289010; doi:10.1186/s13068-017-0717-0), 2017-02-02
Supplement: 13068_2017_717_MOESM2_ESM.pdf [file 13068_2017_717_MOESM2_ESM.pdf]

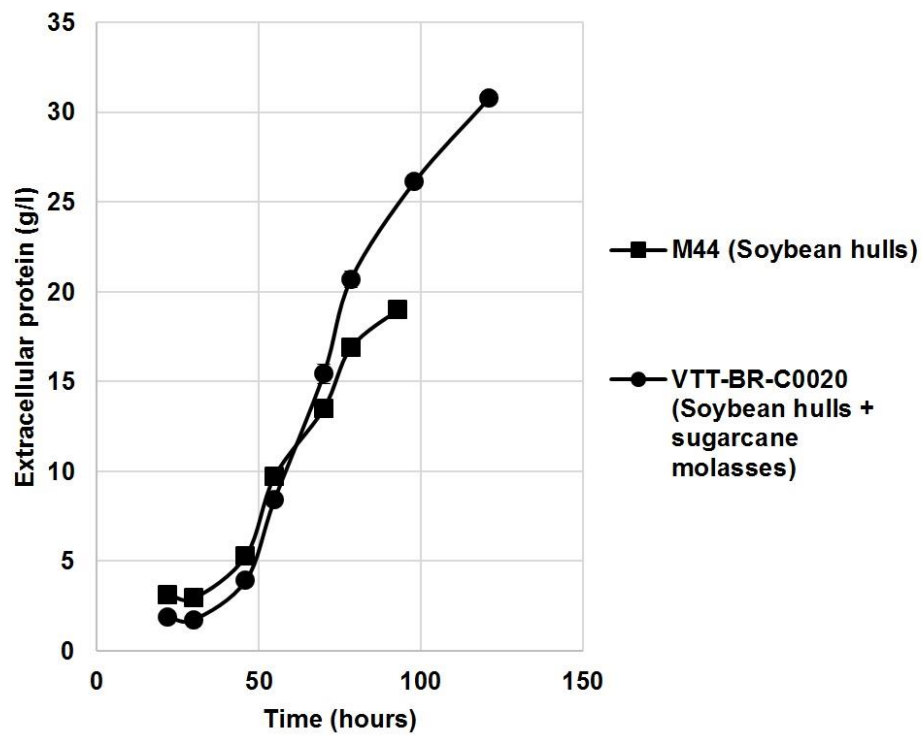

Figure S1

Extracellular protein production by strain M44 cultivated on soybean hulls and VTT-BR-C0020 cultivated on soybean hulls and sugarcane molasses. *Extracellular protein concentrations measured from culture supernatants of bioreactor cultivations of strain M44 on soybean hulls (13% in batch) and VTT-BR-C0020 on a batch medium comprising soybean hulls (13%), and with a feed of acid-inverted molasses.*
