# Supplementary material for: Development of a low-cost cellulase production process using Trichoderma reesei for Brazilian biorefineries
Source: PubMed Central journal article supplement (PMC5289010; doi:10.1186/s13068-017-0717-0), 2017-02-02
Supplement: 13068_2017_717_MOESM4_ESM.pdf [file 13068_2017_717_MOESM4_ESM.pdf]

**Table S3** – Primers used in the assembly of vectors pVTTBR43, pVTTBR54 and pVTTBR92, and for verification of inserts from genomic DNA.

| <i>Primer code</i> | <i>Primer name</i> | <i>5'-3' Sequence</i>                      |
|--------------------|--------------------|--------------------------------------------|
| BR63               | pdc_F              | GCGCCTCAGAGTGTCTGTC                        |
| BR89               | xyr1_ins_R         | GGACAATGGCAGATGCTTGG                       |
| BR103              | TeCel3A_GG_R       | AATGGTCTCTTTCAAATCCAGGGTATGGCTTAAGG        |
| BR104              | TeCel3A_mut_F      | CTGGGCAGGTCCCCCGATGCGGGCAGAAAC             |
| BR105              | TeCel3A_mut_R      | GTTTCTGCCCCGATCGGGGGACCTGCCAG              |
| BR106              | TeCel3A_GG_F       | AATGGTCTCACATGAGGAACGGGTTGCTCAAGGTC        |
| BR117              | pXyn11B_GG_F       | AATGGTCTCAGGGTACAGCATATTTCTGGTGGCAG        |
| BR118              | pXyn11B_GG_R       | AATGGTCTCACATGATGATTATTTGTGCGTGTTC         |
| BR119              | tXyn11B_GG_F       | AATGGTCTCATGAAGTTCTGTTGATGTTGACTGGAGTGGATG |
| BR120              | tXyn11B_GG_R       | AATGGTCTCATCATGTGGCAGGATCTAGCGGGAG         |
| BR133              | pGdpA_GG_F         | AATGGTCTCAATGATCTCCTTAGCTCTG               |
| BR134              | tTrpC_GG_R         | AATGGTCTCAATGATCTCCTTAGCTCTG               |
| BR143              | pXyn11B_F          | CGTAAACTGAGACAGCAAGCTC                     |
| BR145              | tXyn11B_R          | GTCTGTCAAGTAACTCACTAACC                    |
| BR190              | ace2_GG_F          | AATGGTCTCACATGGACCTCCGGCAAGC               |
| BR191              | ace2_GG_R          | AATGGTCTCTTCACTTCAGCAGTCTGGCACTG           |
| BR192              | suc_F              | CACGCGTTCAACATGGACAAG                      |
| BR193              | suc_R              | GTATCGGGAAGGAAAACAACCTG                    |
| BR213              | thi4_mut_F         | GGATAATACCAGCGAAAGGGTCATGCTCCTCCCCCTTTC    |
| BR214              | thi4_mut_R         | GAAAAGGGGGAGGAGCATGACCTTTCGCTGATTATCC      |
| BR215              | thi4_GG_R          | AATGGTCTCATCTCTTCTGAGGTGCCGATCC            |
| BR216              | thi4_GG_F          | AATGGTCTCAATGAGTCCACCACAACCTTCTTAGC        |
| BR259              | CBHflank_suc_InF_F | TTCCCTCCCGATACAGCGATCAACAACCGTGC           |
| BR260              | CBHflank_suc_InF_R | CATGTTGAACGCGTGAGCTGCGGCTAGGACGTC          |
